# Supplementary material for: A Simultaneous Modulation of Reactive and Proactive Inhibition Processes by Anodal tDCS on the Right Inferior Frontal Cortex
Source: PLoS One. 2014 Nov 26;9(11):e113537. doi: 10.1371/journal.pone.0113537 (PMC4245139; doi:10.1371/journal.pone.0113537)
Supplement: Data S1 — Data summary. Average data for all subjects on the different measurements obtained in the task are provided, as well as data used for computing the SSRT with the integration method (percentage of correct inhibition, distribution of the RT and the SSD) and mean method (SSD and mean RT). (XLSX) [file pone.0113537.s001.xlsx]

## Sheet: General data
subject	Stimulation	Go_RT_easy	Go_RT_hard	Stop_RT_easy	Stop_RT_hard	Go_%_easy	Go_%_hard	FA_easy	FA_hard	O_easy	O_hard	ORDER	SSRT_easy mean-method	SSRT_hard mean-method
1	Sham	650.784	659.001	433.453	429.755	96.7593	92.1296	1.85185	14.8148	3.24074	7.87037	1	217.331	229.247
2	Sham	533.647	547.296	313.645	331.222	99.0741	89.8148	0	4.62963	0.925926	10.1852	1	220.002	216.074
3	Sham	447.3	489.671	229.446	305.774	96.2963	81.0185	0.925926	23.1481	3.7037	18.9815	1	217.854	183.897
4	Sham	424.127	476.107	190.431	233.611	98.1481	90.7407	10.1852	38.8889	1.85185	9.25926	1	233.697	242.496
5	Sham	487.494	491.308	231.764	242.394	98.6111	98.1481	3.7037	13.8889	1.38889	1.85185	1	255.73	248.914
6	Sham	536.467	574.266	316.423	356.203	99.0741	86.1111	0	6.48148	0.925926	13.8889	1	220.044	218.063
7	Sham	420.391	464.967	184.879	224.368	99.537	96.2963	2.77778	15.7407	0.462963	3.7037	2	235.512	240.599
8	Sham	486.08	502.141	287.731	309.481	98.6111	85.1852	0	4.62963	1.38889	14.8148	2	198.348	192.661
9	Sham	578.202	569.173	349.262	367.294	96.2963	94.4444	0	1.85185	3.7037	5.55556	2	228.94	201.878
10	Sham	373.902	398.827	149.884	159.911	100	98.6111	1.85185	12.963	0	1.38889	2	224.018	238.915
11	Sham	451.487	472.645	260.903	263.685	99.537	88.8889	5.55556	44.4444	0.462963	10.6481	2	190.584	208.96
12	Sham	492.331	551.641	268.772	311.327	96.7593	92.5926	0.925926	14.8148	3.24074	7.40741	2	223.559	240.314
13	Sham	493.564	540.63	286.806	318.729	97.6852	83.3333	0	14.8148	2.31481	16.6667	1	206.758	221.901
14	Sham	416.6	440.569	174.861	225.444	100	95.8333	3.7037	55.5556	0	4.16667	1	241.739	215.126
15	Sham	483.511	517.037	212.325	268.769	92.5926	90.7407	2.77778	26.8519	6.48148	9.25926	1	271.186	248.268
16	Sham	430.65	454.607	200.763	224.356	99.0741	92.5926	3.7037	32.4074	0.925926	7.40741	1	229.888	230.251
17	Sham	452.986	489.52	203.53	258.592	95.3704	80.5556	1.85185	15.7407	4.62963	18.5185	1	249.456	230.929
18	Sham	489.736	513.001	285.882	329.828	100	85.6481	0	12.037	0	14.3519	2	203.854	183.173
19	Sham	374.156	407.4	179.021	214.49	96.7593	91.2037	12.037	35.1852	3.24074	8.7963	2	195.135	192.91
20	Sham	381.944	442.727	206.161	256.28	100	88.4259	2.77778	17.5926	0	11.5741	2	175.783	186.447
21	Sham	465.065	498.738	242.402	269.229	99.0741	87.037	0.925926	18.5185	0.925926	12.5	2	222.663	229.51
22	Sham	516.906	547.738	313.632	339.086	100	91.2037	0.925926	0.925926	0	8.7963	2	203.274	208.652
1	Anodal	705.594	712.996	503.304	503.304	99.537	92.1296	0	3.7037	0.462963	7.87037		202.291	209.692
2	Anodal	620.645	585.912	422.768	382.102	98.1481	91.2037	0	2.77778	1.85185	8.7963		197.878	203.811
3	Anodal	534.727	542.345	339.548	360.366	97.2222	84.2593	0	7.40741	2.31481	15.2778		195.179	181.979
4	Anodal	483.706	518.521	275.24	300.685	99.0741	100	1.85185	13.8889	0.925926	0		208.466	217.836
5	Anodal	479.423	497.727	252.569	284.959	100	97.2222	0.925926	8.33333	0	2.77778		226.855	212.768
6	Anodal	557.672	561.977	355.282	350.184	100	94.4444	0	8.33333	0	5.55556		202.39	211.793
7	Anodal	523.047	580.009	327.981	369.62	97.2222	80.0926	0.925926	36.1111	2.77778	19.9074		195.066	210.388
8	Anodal	514.86	541.063	316.725	374.239	97.6852	85.1852	0.925926	12.963	2.31481	14.8148		198.135	166.824
9	Anodal	525.867	536.483	296.987	289.12	96.2963	95.3704	0.925926	4.62963	3.7037	4.62963		228.88	247.363
10	Anodal	468.575	494.496	233.605	248.876	99.0741	98.6111	0.925926	8.33333	0.925926	1.38889		234.971	245.62
11	Anodal	526.893	526.139	338.617	336.769	97.2222	80.5556	0.925926	51.8519	2.77778	19.4444		188.277	189.37
12	Anodal	498.623	522.371	288.663	309.018	98.1481	95.3704	0.925926	2.77778	1.85185	4.16667		209.96	213.353
13	Anodal	451.242	450.463	243.328	272.928	98.6111	93.5185	0	25	1.38889	6.48148		207.915	177.535
14	Anodal	517.283	550.398	322.893	329.831	98.1481	93.0556	0	14.8148	1.85185	6.94444		194.391	220.568
15	Anodal	474.382	499.3	251.648	248.408	96.2963	96.2963	0	25	3.7037	3.24074		222.734	250.892
16	Anodal	415.866	472.515	189.663	234.996	100	93.0556	0.925926	24.0741	0	6.94444		226.203	237.519
17	Anodal	458.503	508.756	275.244	286.341	88.8889	77.7778	1.85185	18.5185	11.1111	22.2222		183.259	222.415
18	Anodal	452.946	481.542	244.707	261.826	99.537	86.1111	0.925926	25	0.462963	13.8889		208.238	219.716
19	Anodal	412.337	444.91	181.952	226.213	97.6852	91.2037	4.62963	27.7778	2.31481	8.7963		230.385	218.697
20	Anodal	374.044	412.886	167.004	245.174	96.7593	76.8519	5.55556	50	3.24074	23.1481		207.041	167.712
21	Anodal	490.393	527.633	254.885	281.722	94.9074	83.3333	1.85185	13.8889	4.62963	16.6667		235.508	245.911
22	Anodal	529.573	556.951	339.082	369.619	99.537	91.2037	0	1.85185	0.462963	8.7963		190.49	187.332

## Sheet: RT for SSRT integration method
s01e1	s01h1	s01e2	s01h2	s02e1	s02h1	s02e2	s02h2	s03e1	s03h1	s03e2	s03h2	s04e1	s04h1	s04e2	s04h2	s05e1	s05h1	s05e2	s05h2	s06e1	s06h1	s06e2	s06h2	s07e1	s07h1	s07e2	s07h2	s08e1	s08h1	s08e2	s08h2	s09e1	s09h1	s09e2	s09h2	s10e1	s10h1	s10e2	s10h2	s11e1	s11h1	s11e2	s11h2	s12e1	s12h1	s12e2	s12h2	s13e1	s13h1
509	665	555	723	413	536	413	460	368	410	364	549	469	386	398	483	543	576	353	401	395	620	548	575	468	427	346	467	422	471	405	492	346	534	491	417	290	452	394	340	372	446	383	422	444	789	608	1016	409	509
622	495	671	604	440	464	433	628	328	443	412	255	326	318	423	552	434	539	479	434	562	813	491	511	340	378	397	321	434	509	473	496	499	469	621	529	293	407	350	479	318	484	425	639	378	438	382	502	346	445
459	527	629	733	451	463	533	355	460	376	233	324	395	342	522	413	490	580	357	482	382	614	527	557	436	444	398	366	394	470	407	422	461	466	678	615	354	385	378	391	412	447	409	549	370	370	298	293	363	453
449	724	636	672	627	414	409	556	455	576	453	465	315	628	408	406	390	466	488	560	452	709	521	534	449	435	491	465	588	581	467	482	465	502	546	527	339	482	431	414	523	530	896	424	427	528	517	881	494	419
705	424	772	530	423	499	550	457	441	567	463	470	508	536	369	378	477	583	583	573	455	633	490	661	384	584	441	400	433	533	619	566	771	584	599	505	338	317	651	406	400	370	554	540	331	464	468	437	455	537
523	433	616	654	428	507	408	562	444	467	512	341	454	547	383	590	559	626	512	595	470	533	508	511	449	413	413	392	586	529	408	441	554	536	608	540	308	361	374	439	396	406	392	494	321	557	574	450	412	594
566	606	535	686	439	409	464	562	375	565	314	699	480	502	347	471	441	599	282	473	567	582	531	494	479	487	321	413	564	580	463	424	517	619	664	562	281	386	322	517	457	562	432	494	397	413	707	661	575	705
629	719	535	556	450	532	439	550	419	364	406	386	348	526	376	436	563	563	522	505	534	500	501	516	594	504	382	421	536	487	411	401	486	661	567	585	343	409	345	396	428	514	409	462	478	605	351	554	414	446
486	672	643	690	540	483	503	600	475	591	693	447	620	494	327	627	613	612	415	288	494	584	509	509	451	438	438	410	644	529	528	471	457	507	531	582	436	403	411	564	414	431	388	672	440	555	512	526	684	462
493	580	706	561	415	454	426	565	519	374	440	272	506	502	498	444	530	539	427	454	560	519	494	510	436	478	416	463	442	664	400	394	518	756	582	595	345	379	379	371	341	443	472	496	354	514	666	760	509	439
663	385	529	621	441	579	563	679	516	274	304	245	443	523	453	746	338	711	539	518	507	713	683	581	447	490	366	455	510	425	513	407	668	426	609	595	303	437	391	337	367	435	532	508	398	641	509	504	587	426
520	544	601	814	552	418	463	430	469	393	328	571	397	604	375	502	545	549	543	488	433	561	475	464	337	746	467	570	500	489	441	393	709	467	626	603	310	375	346	373	384	430	347	411	391	521	456	863	518	431
467	411	705	707	562	455	390	451	381	494	491	332	431	700	481	441	602	526	741	586	481	586	473	587	336	708	451	455	407	516	456	419	448	372	523	712	388	448	492	353	352	480	400	412	652	522	358	339	451	433
528	509	763	760	496	567	442	530	435	515	302	426	469	458	446	562	472	560	353	370	599	658	544	591	450	548	353	479	544	600	412	546	478	519	500	593	511	517	345	378	421	430	600	455	534	491	696	511	446	568
532	382	555	578	560	456	581	533	614	456	373	641	366	540	389	418	471	749	496	485	449	651	445	471	378	449	440	584	436	399	581	647	644	544	583	481	407	543	442	329	428	581	313	327	471	887	277	490	404	508
669	572	684	628	475	540	579	555	299	445	495	507	430	560	462	355	447	529	349	281	511	600	536	532	334	354	384	483	391	514	390	580	520	528	606	607	460	334	434	477	537	461	338	429	544	518	526	575	447	548
518	793	738	641	508	513	558	519	280	354	814	303	468	609	385	532	484	564	364	454	762	501	592	485	643	348	442	549	402	470	397	428	560	488	570	506	319	361	349	379	423	408	440	469	436	788	444	732	475	527
671	507	774	678	534	456	521	487	385	456	406	268	504	455	341	313	482	354	317	456	509	710	500	607	485	505	359	439	533	452	466	665	527	457	561	579	472	398	370	376	435	490	419	445	486	541	307	638	387	527
594	691	761	625	676	461	583	612	323	530	347	764	408	434	495	447	527	325	498	335	550	555	604	766	450	541	353	645	664	527	525	422	503	482	530	565	379	428	410	348	409	475	489	424	433	568	654	504	491	399
644	561	631	648	592	515	498	582	462	287	403	525	396	624	331	382	468	515	359	505	525	468	461	602	449	413	415	475	482	606	485	441	546	438	660	566	374	437	413	370	503	305	460	606	344	408	368	731	329	465
523	699	762	637	490	531	445	542	459	512	483	810	659	564	662	329	389	630	483	455	534	555	511	516	468	413	425	536	425	491	439	536	486	660	574	464	375	412	374	402	473	442	551	516	500	540	510	338	588	541
553	423	777	718	385	555	510	648	556	565	521	521	525	500	381	315	416	613	504	599	514	562	566	589	362	456	405	506	539	593	393	450	476	545	630	669	390	397	369	362	428	355	596	466	388	716	683	397	474	484
588	613	594	636	439	435	494	616	432	270	447	601	594	786	490	487	986	581	421	475	677	544	552	536	401	315	658	535	455	501	459	476	600	512	458	590	423	380	519	349	540	558	547	414	449	461	376	563	366	526
604	551	641	589	342	516	523	520	386	485	468	534	395	616	428	785	488	492	533	331	581	619	545	552	431	392	370	518	552	576	433	451	501	558	544	585	353	339	360	337	441	525	429	445	431	626	316	548	450	540
496	581	573	623	686	399	391	525	459	362	551	600	399	700	374	477	381	462	496	613	609	755	493	657	359	466	510	478	474	535	496	552	512	458	571	648	377	410	400	431	356	590	671	522	460	500	532	375	458	461
696	688	693	656	511	589	482	564	335	320	437	478	394	524	495	641	495	542	704	347	615	554	554	587	468	470	438	622	523	597	453	436	461	498	517	517	359	416	303	376	466	401	448	438	478	421	321	502	430	448
563	404	649	698	431	462	510	413	468	260	399	592	445	478	387	372	498	553	517	581	523	558	622	633	418	524	301	374	456	923	543	457	768	568	575	707	380	422	414	382	450	450	384	401	569	473	462	669	513	600
473	514	741	691	539	540	458	482	464	280	481	749	406	491	327	352	572	581	419	585	588	830	458	654	311	399	511	410	761	502	651	387	467	555	549	518	439	413	342	398	419	467	592	487	414	494	500	575	479	535
600	523	570	630	506	544	461	518	402	267	550	548	455	432	402	316	588	578	337	472	632	545	606	486	399	367	332	419	429	641	395	422	598	516	573	493	382	434	376	383	442	435	677	513	503	794	344	463	456	534
569	647	718	649	481	448	566	622	338	517	500	571	437	542	412	303	488	558	381	411	507	530	559	520	341	433	370	433	486	467	474	470	654	447	542	552	353	408	328	399	521	479	315	487	444	544	349	521	478	444
554	674	621	769	491	649	565	622	397	493	494	262	459	380	400	365	427	514	489	507	573	547	712	534	417	602	482	738	568	601	463	456	551	485	521	514	610	427	309	336	536	432	434	434	574	394	685	586	460	557
594	461	609	807	469	502	588	571	408	292	536	333	373	611	438	689	619	736	544	450	564	790	350	572	457	468	400	436	596	465	451	445	555	479	539	494	365	385	408	360	560	489	441	526	292	667	901	457	457	475
590	786	797	618	467	468	692	526	335	545	445	942	325	466	382	502	519	619	491	332	688	765	630	434	291	465	436	484	557	487	483	589	480	519	656	489	327	509	345	488	504	469	348	481	465	503	798	526	531	471
363	537	631	892	445	601	570	619	308	344	532	522	374	481	397	420	529	644	574	526	560	543	611	544	331	503	344	346	491	477	533	429	513	374	843	528	478	371	399	377	449	602	571	375	529	528	502	536	442	431
616	694	628	672	434	487	581	773	409	523	310	1007	556	406	415	644	553	613	414	537	474	773	499	521	314	418	375	479	502	511	493	568	481	660	422	527	346	398	377	408	583	375	484	457	581	412	505	582	550	571
704	698	714	705	466	460	539	583	287	655	472	510	394	465	391	532	599	499	471	342	591	584	585	520	554	543	341	424	584	496	415	475	495	492	540	567	371	436	350	398	506	451	475	430	488	613	839	780	448	625
534	529	484	826	503	466	508	581	316	287	468	349	469	465	379	464	718	564	440	500	513	537	433	561	371	462	426	481	462	530	410	554	498	655	489	482	418	510	381	395	536	494	432	441	400	465	377	418	509	718
544	595	681	861	493	499	579	489	275	300	483	578	452	432	304	377	770	622	385	493	414	513	552	674	418	662	491	379	526	433	408	520	435	794	530	583	388	445	459	325	426	483	470	419	563	495	372	467	607	533
678	660	649	571	705	545	614	486	582	468	479	331	555	560	340	462	485	477	526	450	736	738	534	618	395	669	433	452	409	445	484	440	652	614	571	401	392	502	329	383	465	437	413	441	463	574	597	516	532	468
774	599	740	619	598	512	582	532	320	491	493	830	533	585	329	403	768	370	331	527	612	609	1017	687	472	392	345	465	548	475	466	545	501	575	642	571	376	402	420	379	545	502	648	522	501	508	570	539	342	440
577	460	692	767	456	514	573	698	625	317	559	442	398	403	357	465	662	316	484	516	686	673	552	520	364	422	376	468	541	451	475	567	642	723	482	654	356	355	461	286	356	521	391	506	504	720	486	512	691	493
524	731	576	654	502	457	487	595	408	384	642	583	467	536	363	419	521	589	542	467	443	482	434	505	313	458	403	443	564	630	599	463	795	740	537	624	375	416	370	327	478	475	438	381	514	623	512	563	504	419
659	575	554	662	492	515	462	479	390	326	430	436	422	303	382	448	624	572	436	550	492	555	418	608	354	423	406	420	542	446	518	427	486	501	676	623	403	389	356	419	498	618	532	350	650	717	569	698	603	632
743	740	586	834	450	526	622	531	366	433	354	524	477	486	398	409	371	370	475	417	519	535	398	563	384	428	426	453	467	465	502	422	485	510	618	455	378	416	433	352	478	486	450	515	504	512	447	520	483	542
803	657	636	453	489	497	497	587	337	642	500	511	754	646	469	316	610	574	417	454	638	565	502	617	403	355	327	532	454	508	460	615	522	477	865	542	353	391	394	344	417	562	290	480	555	779	558	858	664	452
656	644	549	617	495	481	560	540	304	439	332	500	413	603	368	389	665	636	528	494	479	657	505	635	492	529	526	452	467	545	609	421	444	450	736	639	369	408	361	353	510	480	258	461	524	515	419	458	638	471
661	646	762	567	433	568	546	1036	464	549	323	507	403	566	355	416	468	585	632	560	537	524	658	649	318	383	417	484	452	506	448	464	483	505	614	551	347	493	341	430	484	541	459	809	499	619	507	523	420	468
652	848	958	990	435	531	590	589	417	285	577	595	428	503	474	364	525	503	539	518	613	647	461	612	422	361	366	514	662	448	557	445	512	513	705	755	421	409	309	386	481	598	507	260	446	435	311	480	471	422
717	639	759		531	541	482	499	557	453	388	623	444	606	412	440	434	681	497	359	582	684	525	539	492	455	449	407	626	628	529	460	512	517	667	726	339	418	310	699	614	426	418	507	599	399	529	499	448	624
581	852	555	590	466	523	595	426	491	381	477	666	421	523	442	545	565	497	381	396	480	572	498	746	419	395	405	539	408	562	515	565	540	557	519	621	340	437	286	469	449	457	333	413	371	635	511	375	521	578
699	741	515	678	562	595	471	358	522	360	435	521	577	596	335	482	578	562	552	400	344	585	492	604	420	365	436	430	476	582	459	422	644	505	512	557	492	392	359	333	569	413	429	299	657	280	286	563	519	523
600	798	648	605	600	518	426	536	492	363	355	733	360	591	465	439	516	698	398	468	564	492	481	527	392	400	390	436	521	400	515	514	475	548	625	601	375	400	373	290	393	409	506	517	398	509	577	860	480	386
734	484	620	632	524	555	851	502	460	362	544	715	544	548	424	468	523	488	592	588	624	590	523	539	578	416	513	509	472	473	515	464	553	632	668	696	325	339	327	359	569	479	377	552	759	544	397	559	456	284
534	540	575	692	448	484	448	561	816	281	575	812	494	398	434	441	416	599	472	455	617	445	594	562	358	316	342	757	575	509	399	563	508	527	745	696	432	643	410	344	464	704	379	406	688	480	371	500	471	542
493	589	595	653	413	727	375	589	388	432	360	485	364	409	393	789	512	503	301	703	481	529	452	529	451	364	330	415	424	440	472	509	567	497	431	719	365	547	416	355	591	457	491	463	550	694	584	620	490	514
362	633	587	846	522	487	500	577	424	307	289	618	484	557	510	398	693	564	373	450	500	558	486	392	415	455	340	435	551	429	495	473	549	469	519	493	373	375	389	360	394	531	387	429	391	610	363	440	500	569
581	552	751	543	490	599	465	553	402	306	479	723	451	489	376	456	638	340	530	542	403	428	539	592	489	537	308	384	543	503	585	429	627	448	569	645	391	449	406	363	528	428	403	360	443	822	333	585	487	505
481	616	726	763	396	499	546	545	491	276	271	528	360	331	471	529	602	511	407	361	484	561	659	542	423	460	474	383	451	467	620	478	700	547	598	607	359	484	382	369	521	435	420	432	586	614	549	420	508	503
734	612	716	761	631	542	505	516	555	573	444	508	457	687	506	416	469	590	476	385	676	621	482	619	520	529	338	401	655	502	457	485	558	487	524	631	390	413	411	492	568	377	458	505	510	620	512	463	419	538
542	541	674	736	560	461	600	512	412	476	484	732	400	562	346	478	477	276	401	480	677	859	457	695	395	467	366	495	454	425	484	462	490	517	652	670	393	393	433	442	460	427	429	501	877	543	461	540	560	401
649	643	629	773	495	488	496	580	314	378	318	844	422	512	369	356	453	795	444	476	865	532	498	652	443	461	529	394	499	569	543	566	490	535	729	657	478	478	348	401	491	524	435	464	375	429	538	596	534	601
612	669	827	829	424	645	801	637	450	308	610	637	506	473	384	466	414	450	465	332	572	569	532	609	417	341	498	456	471	405	474	437	467	584	529	801	438	426	347	411	535	459	403	262	459	799	430	697	499	478
451	556	728	690	647	650	540	650	304	412	507	510	481	548	387	438	542	623	478	369	548	676	502	753	504	396	397	435	456	501	430	522	521	518	475	570	360	371	348	377	386	465	446	619	359	503	496	517	506	570
607	626	552	548	480	684	631	465	459	240	397	590	389	521	306	329	447	533	603	332	577	647	456	503	349	381	337	382	578	564	470	356	779	659	525	557	342	398	476	419	429	544	348	407	517	364	579	467	693	485
759	741	736	620	504	606	579	529	385	278	522	526	620	433	536	345	515	541	353	449	512	539	762	577	434	531	358	426	476	565	553	503	578	567	707	717	520	351	389	395	387	555	366	369	659	531	480	560	471	626
597	756	735	697	624	490	489	870	481	404	505	824	563	446	344	522	426	448	515	461	511	589	435	606	439	424	477	564	471	522	560	511	534	641	550	413	313	365	309	382	520	460	355	381	399	469	594	700	458	492
610	717	755	733	484	521	552	810	281	800	576	737	408	463	361	624	433	342	328	386	546	655	771	771	383	529	460	683	643	600	457	424	623	490	337	676	375	439	294	405	398	576	351	412	419	405	288	857	445	499
649	615	862	808	462	503	614	454	278	392	443	599	513	557	444	239	609	344	563	512	495	486	423	622	486	479	395	668	636	610	515	488	536	624	826	803	324	419	428	367	510	640	348	508	292	816	497	703	477	791
587	593	955	718	531	472	640	601	548	298	568	484	407	550	537	418	462	579	466	517	531	533	453	615	338	575	487	417	529	527	452	523	603	551	440	613	355	364	320	380	605	507	431	400	483	519	528	531	509	432
671	581	682	749	820	698	620	623	504	248	434	776	706	521	326	360	364	456	490	435	566	487	603	522	437	486	318	459	520	622	388	436	516	645	458	524	327	325	310	320	622	499	531	461	238	633	381	439	655	488
545	546	749	726	491	467	786	744	491	425	400	347	445	529	493	368	582	336	299	501	574	519	748	399	438	406	369	482	416	499	454	419	621	557	578	548	364	409	293	359	422	548	306	539	512	590	413	522	470	486
739	797	989	717	443	633	660	950	474	511	499	738	328	681	379	707	637	411	386	437	665	547	450	535	481	661	355	486	441	484	483	479	770	502	786	812	334	312	270	323	257	585	479	506	427	936	362	556	422	364
641	766	680	769	578	598	595	532	543	386	410	560	321	447	331	420	387	534	362	301	439	422	451	637	373	403	445	366	344	387	418	571	403	504	664	660	333	424	359	324	515	529	441	392	498	559	473	497	484	634
696	774	779	788	482	504	552	541	252	390	519	558	382	721	338	360	553	503	554	513	494	455	484	604	487	513	387	522	433	458	368	425	682	501	765	556	313	358	301	305	437	437	386	478	547	826	432	289	363	476
783	608	773	816	616	520	566	691	249	307	561	716	512	369	499	356	377	486	412	330	548	603	438	625	418	503	395	530	420	535	515	430	542	587	567	602	306	464	353	280	485	772	301	443	492	244	414	460	381	731
582	713	820	822	596	513	767	554	332	463	562	544	403	285	364	382	466	497	543	485	500	651	465	512	468	503	462	452	431	483	704	432	622	585	543	511	304	445	312	342	415	483	350	523	516	468	444	465	452	619
796	690	635	542	586	664	430	635	419	616	490	537	592	357	337	446	391	339	367	611	525	464	467	516	324	545	472	480	460	414	474	417	594	520	584	706	391	399	346	373	454	437	340	595	393	516	597	496	432	837
670	688	659	616	586	500	567	544	286	333	430	527	389	337	663	553	608	554	494	631	561	541	571	569	552	547	416	454	440	518	438	467	682	514	792	527	409	428	366	339	532	405	365	345	434	521	486	595	479
645	745	744	657	554	616	422	737	243	292	457	542	450	464	329	409	374	317	350	441	440	512	420	521	430	491	459	456	467	488	474	624	597	513	620	765	367	405	284	450	434	450	440	457	813	698	514	644	553
659	649	665	722	540	582	552	536	310	486	385	560	456	451	398	842	438	529	393	582	478	527	433	530	507	555	457	447	394	631	466	511	502	605	388	563	410	476	362	371	441	436	477	552	377	680	530	459	626
687	619	701	667	590	497	578	579	571	311	598		399	352	404	375	413	645	460	378	486	553	592	589	531	479	511	557	381	375	436	638	459	591	462	662	407	380	355	372	419	466	440	415	521	670	297	313	457
723	853	551	737	481	589	526	425	587	465	342		328	381	497	540	211	386	535	415	492	546	591	428	438	579	494	534	598	469	449	478	505	527	531	813	382	313	356	365	396	452	436	516	432	555	462	491	494
786	575	631	727	592	523	673	423	356	283	548		490	346	306	381	477	340	417	548	446	542	625	575	617	511	440	428	526	610	379	611	599	488	876	524	445	408	327	334	526	529	396	488	400	579	558	514	476
872	544	643	660	688	813	696	428	314	353	475		442	390	376	377	580	289	280	454	553	438	661	510	461	363	357	368	471	396	458	361	565	508	919	648	397	353	338	366	425	332	331	395	540	459	480	421	441
536	578	779	616	518	548	676	458	390	455	642		421	515	413	367	825	389	543	494	475	489	504	533	447	374	432	469	417	682	401	584	521	618	542	681	437	364	377	319	444	478	422	435	712		495	616	438
808	590	681	800	573	662	735	493	428	699	555		354	404	304	291	348	542	613	465	471	460	534	594	485	449	362	478	612	523	457	460	605	584	495	444	331	375	363	366	497	460	429	479	881	482	416	548	536
690	659	702	765	491	574	518	408	472	729	442		458	624	358	283	522	399	413	372	473	530	512	538	454	423	500	367	519	585	441	408	646	559	608	726	370	343	349	361	431	466	418	312	488	422	432	512	800
777	697	800	585	588	633	642	463	470	839	619		384	336	303	420	484	377	333	524	577	546	444	517	395	536	445	392	549	612	611	548	620	503	711	771	320	443	342	403	427	415	303	628	380	319	577	526	542
710	750	857	666	605	468	585	547	539	345	648		549	391	301	356	282	337	541	550	701	603	422	575	468	474	386	448	409	624	469	464	656	551	580	562	318	422	388	814	484	398	411		644	568	400	432	689
775	631	625	665	583	501	544	540	539	345	595		373	433	453	533	554	508	400	351	519	473	564	609	403	610	339	447	553	393	575	694	558	630	549	633	465	488	284	410	562	511	401		437	415	479	406	433
521	690	591	794	594	557	584	558	361	340	434		494	479	431	434	378	481	407	449	513	617	566	555	445	501	455	499	541		458	478	506	581	700	548	456	305	467	390	463	495	402		554	542	546	489	470
529	640	674	856	430	519	580	593	291	669	273		416	324	396	297	490	515	548	472	536	561	525	486	361	608	492	513	662		458	424	607	544	951	730	297	438	376	448	460	524	423		481	655	421	469	486
755	640	726	726	503	539	505	610	787	419	609		304	435	412	701	456	466	436	281	457	623	462	522	420	501	398	492	660		432	528	534	596	621	521	441	470	366	393	414	490	452		459	568	449	582	462
581	659	661	656	559	510	743	509	508	315	396		378	390	352	571	302	511	491	577	526		550		465	438	380	466	390		422	616	736	527	554	591	407	503	336	342	475	455	377		495	689	497	496	488
606	734	628	601	585	563	596		510	692	431		384	311	282	747	519	268	422	709	637		553		468	505	459	309	404		413		556	433	655	512	367	313	473	465	477	442	569		515	509	632	620	483
615	803	687	691	496	568	618		440		624		391		361	343	472	424	423	555	484		554		412	372	368	387	543		424		492	594	464	404	307	338	381	370	518	497	412		850	383	533	525	554
788	679	640	591	503	563	639		464		453		379		330	502	536	655	508	531	579		454		416	398	452	333	368		446		595	711	585	502	336	429	368	342	367	517	442		558	1047	463	627	479
673	715	653	660	494	551	523		521		500		393		374	476	517	382	569	520	536		456		404	520	381	433	432		536		661	564	575	742	463	305	366	313	512	699	422		347	463	531	602	425
572	653	604	786	618	549	491		416		379		469		419	475	399	518	627	465	545		512		385	469	471	497	509		324		589	341	573	591	380	450	337	360	415	227	367		582	551	446		525
652	665	832		526	613	535		422		538		380		525	432	450	402	570	450	517		532		576	414	331	494	379		376		401	566	532	577	416	366	383	341	465	463	536		879	516	428		632
845		578		622		763		250		563		311		468	652	510	601	550	356	471		414		344	430	466	361	386		458		561	561			353	428	333	371	481	407	507		565	383	400		507
611		749		483		503		404		417		451		352		567	465	433	461	558		508		522	337	354	445	412		656		761	568			335	475	320	447	578	592	410		561	399	459
638				460		434		595		661		600		386		449	505	700	573	682		508		326	451	300	428	504		424		661	661			408	395	369	315	578	525	400		390		993
775				684		497				545		392		479		335	472	515	511	679		457		525	411	367	378	566		526		664	593			328	428	430	392	496	536	418		559		516
662				542		532				338		458		412		439	460	454	578	663		391		526		406		561		403		503				373	366	338	421	474		391		445
653				519		475						372				521	501	737	463	630		674		450		501		359		451		620				417		352	317	548		460
610				588		488						408				652				740		515		414		314				419		655				387		346	415	499		479
																										311						638				290		296	378	466
[truncated: 126 more columns]

## Sheet: SSRT integration method
subject	Stimulation	% correct inhibitions				go nth RT				ssd				SSRT				SSRT-e	SSRT-h
		e1	h1	e2	h2	e1	h1	e2	h2	e1	h1	e2	h2	e1	h1	e2	h2
1	Sham	41.5094	39.6226	35.8491	33.9623	597	606	635	649	413.561	416.343	453.344	443.167	183.439	189.657	181.656	205.833	182.547	197.745
2	Sham	47.1698	47.1698	43.3962	39.6226	496	515	523	533	297.915	329.363	329.376	333.081	198.085	185.637	193.624	199.919	195.855	192.778
3	Sham	52.8302	50.9434	49.0566	43.3962	432	404	468	525	225.743	278.478	233.15	333.07	206.257	125.522	234.85	191.93	220.554	158.726
4	Sham	52.8302	52.8302	52.8302	52.8302	442	502	396	441	203.539	254.431	177.322	212.791	238.461	247.569	218.678	228.209	228.569	237.889
5	Sham	50.9434	52.8302	50.9434	54.717	495	533	478	482	249.804	268.3	213.724	216.489	245.196	264.7	264.276	265.511	254.736	265.106
6	Sham	45.283	49.0566	47.1698	47.1698	525	558	508	552	342.331	360.826	290.515	351.58	182.669	197.174	217.485	200.42	200.077	198.797
7	Sham	50.9434	50.9434	54.717	50.9434	460	406	416	455	202.619	243.335	167.139	205.4	257.381	162.665	248.861	249.6	253.121	206.132
8	Sham	47.1698	47.1698	47.1698	49.0566	474	502	458	467	296.061	303.463	279.402	315.498	177.939	198.537	178.598	151.502	178.269	175.019
9	Sham	47.1698	47.1698	45.283	47.1698	534	527	569	577	331.22	333.991	367.304	400.598	202.78	193.009	201.696	176.402	202.238	184.706
10	Sham	52.8302	54.717	54.717	52.8302	375	413	369	377	156.969	173.013	142.8	146.809	218.031	239.987	226.2	230.191	222.116	235.089
11	Sham	45.283	49.0566	49.0566	50.9434	454	467	423	461	284.963	281.267	236.843	246.104	169.037	185.733	186.157	214.896	177.597	200.315
12	Sham	49.0566	47.1698	45.283	49.0566	481	521	468	521	270.159	329.363	267.385	293.291	210.841	191.637	200.615	227.709	205.728	209.673
13	Sham	49.0566	49.0566	47.1698	47.1698	479	499	481	543	267.374	307.161	306.239	330.296	211.626	191.839	174.761	212.704	193.194	202.271
14	Sham	56.6038	52.8302	49.0566	52.8302	427	466	407	383	165.607	275.707	184.115	175.18	261.393	190.293	222.885	207.82	242.139	199.056
15	Sham	52.8302	50.9434	49.0566	49.0566	424	483	518	522	173.937	224.824	250.713	312.713	250.063	258.176	267.287	209.287	258.675	233.731
16	Sham	50.9434	52.8302	52.8302	50.9434	451	456	426	465	203.535	237.77	197.991	210.941	247.465	218.23	228.009	254.059	237.737	236.144
17	Sham	50.9434	43.3962	50.9434	50.9434	480	480	406	482	226.656	286.807	180.404	230.376	253.344	193.193	225.596	251.624	239.47	222.408
18	Sham	50.9434	47.1698	47.1698	47.1698	480	489	482	518	277.556	339.537	294.209	320.119	202.444	149.463	187.791	197.881	195.118	173.672
19	Sham	54.717	54.717	50.9434	54.717	385	435	364	380	190.589	211.563	167.454	217.417	194.411	223.437	196.546	162.583	195.479	193.01
20	Sham	52.8302	49.0566	52.8302	50.9434	408	465	367	400	240.554	289.583	171.769	222.976	167.446	175.417	195.231	177.024	181.339	176.22
21	Sham	49.0566	49.0566	47.1698	50.9434	449	484	474	516	235.931	265.535	248.872	272.922	213.069	218.465	225.128	243.078	219.098	230.771
22	Sham	49.0566	49.0566	47.1698	45.283	482	537	517	546	315.481	335.848	311.783	342.324	166.519	201.152	205.217	203.676	185.868	202.414
1	Anodal	35.8491	35.8491	37.7358	35.8491	635	626	711	705	494.983	469.069	511.624	537.539	140.017	156.931	199.376	167.461	169.696	162.196
2	Anodal	41.5094	45.283	43.3962	45.283	554	549	615	555	429.204	360.824	416.331	403.38	124.796	188.176	198.669	151.62	161.732	169.898
3	Anodal	43.3962	41.5094	47.1698	45.283	512	515	535	541	368.23	382.113	310.867	338.619	143.77	132.887	224.133	202.381	183.952	167.634
4	Anodal	49.0566	45.283	47.1698	45.283	476	502	472	499	280.324	309.941	270.156	291.43	195.676	192.059	201.844	207.57	198.76	199.815
5	Anodal	50.9434	49.0566	49.0566	47.1698	491	478	486	532	229.435	248.87	275.702	321.048	261.565	229.13	210.298	210.952	235.931	220.041
6	Anodal	49.0566	45.283	41.5094	43.3962	526	537	550	536	342.324	355.274	368.241	345.094	183.676	181.726	181.759	190.906	182.718	186.316
7	Anodal	45.283	43.3962	43.3962	45.283	476	527	522	596	296.987	372.856	358.976	366.385	179.013	154.144	163.024	229.615	171.019	191.88
8	Anodal	43.3962	45.283	47.1698	45.283	481	509	472	530	316.417	361.748	317.033	386.73	164.583	147.252	154.967	143.27	159.775	145.261
9	Anodal	45.283	45.283	47.1698	45.283	504	516	492	519	291.435	285.881	302.539	292.359	212.565	230.119	189.461	226.641	201.013	228.38
10	Anodal	50.9434	52.8302	50.9434	50.9434	481	496	461	490	234.069	250.724	233.141	247.028	246.931	245.276	227.859	242.972	237.395	244.124
11	Anodal	45.283	47.1698	41.5094	43.3962	505	511	483	497	324.743	325.67	352.491	347.867	180.257	185.33	130.509	149.133	155.383	167.231
12	Anodal	50.9434	47.1698	47.1698	47.1698	495	504	491	509	295.133	329.37	282.193	288.665	199.867	174.63	208.807	220.335	204.337	197.482
13	Anodal	50.9434	49.0566	49.0566	52.8302	446	464	464	439	235.922	289.581	250.733	256.274	210.078	174.419	213.267	182.726	211.672	178.572
14	Anodal	45.283	49.0566	47.1698	43.3962	506	529	508	537	328.448	335.852	317.337	323.809	177.552	193.148	190.663	213.191	184.107	203.169
15	Anodal	50.9434	49.0566	49.0566	49.0566	471	475	466	499	246.098	241.465	257.198	255.352	224.902	233.535	208.802	243.648	216.852	238.592
16	Anodal	54.717	50.9434	52.8302	49.0566	423	475	422	463	190.591	223.896	188.735	246.096	232.409	251.104	233.265	216.904	232.837	234.004
17	Anodal	49.0566	50.9434	50.9434	47.1698	407	468	489	526	271.078	269.224	279.409	303.457	135.922	198.776	209.591	222.543	172.756	210.659
18	Anodal	52.8302	49.0566	49.0566	49.0566	458	489	427	466	249.794	281.254	239.62	242.398	208.206	207.746	187.38	223.602	197.793	215.674
19	Anodal	54.717	52.8302	52.8302	49.0566	394	418	447	443	170.543	193.369	193.361	259.057	223.457	224.631	253.639	183.943	238.548	204.287
20	Anodal	52.8302	52.8302	50.9434	52.8302	351	406	365	404	181.967	223.891	152.041	266.457	169.033	182.109	212.959	137.543	190.996	159.826
21	Anodal	47.1698	49.0566	52.8302	52.8302	504	528	453	499	295.135	346.024	214.635	217.42	208.865	181.976	238.365	281.58	223.615	231.778
22	Anodal	47.1698	41.5094	47.1698	43.3962	514	541	530	534	355.269	381.181	322.896	358.056	158.731	159.819	207.104	175.944	182.918	167.881
